# Supplementary material for: Recovery of Sugar and Nutrients from Algae and Colocasia esculenta (Taro) Leaves Using Chemical Hydrolysis
Source: MDPI journal article supplement (doi:10.3390/su142416383), 2022-12-07
Supplement: s1 [file s1]

## Supplementary Materials:

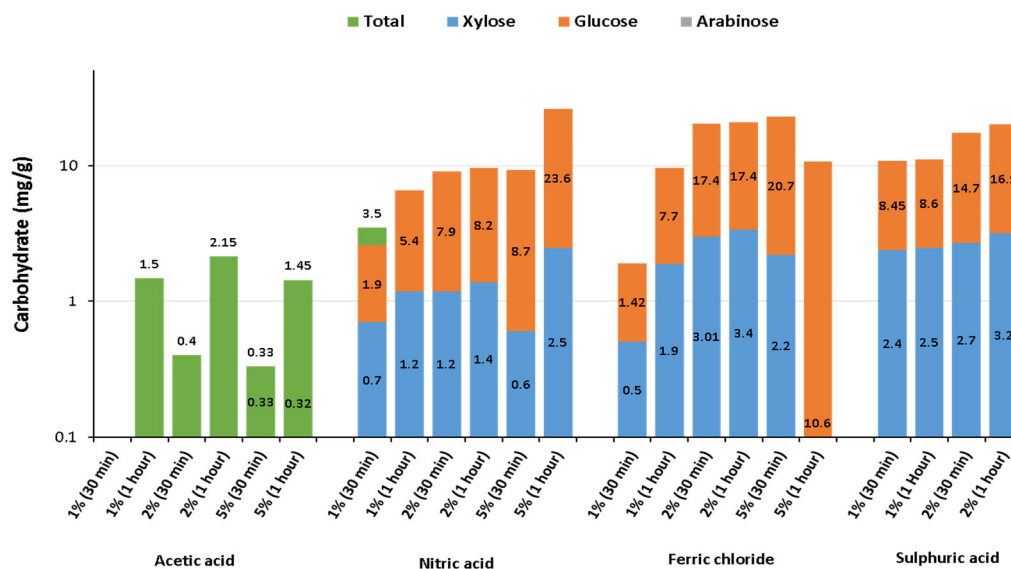

**Figure S1.** Carbohydrate (mg/g) in the different hydrolysates of pure cellulose powder. *Number in the figure shows the concentration (mg/g) of individual components (legend). Number on the top of each column shows the total carbohydrate content.*

**Table S1. COD and TOC data obtained from various hydrolysis procedures for algae**

|            | Acetic acid |    |    |    |    |    | HNO <sub>3</sub> |    |    |    |    |    | FeCl <sub>3</sub> |    |    |    |    |    | H <sub>2</sub> SO <sub>4</sub> |    |
|------------|-------------|----|----|----|----|----|------------------|----|----|----|----|----|-------------------|----|----|----|----|----|--------------------------------|----|
| parameters | 1%          | 2% | 5% | 1% | 2% | 5% | 1%               | 2% | 5% | 1% | 2% | 5% | 1%                | 2% | 5% | 1% | 2% | 5% | 1%                             | 2% |
| (m/g)      | 30          | 1  | 30 | 1  | 30 | 1  | 30               | 1  | 30 | 1  | 30 | 1  | 30                | 1  | 30 | 1  | 30 | 1  | 30                             | 1  |
|            | mi          | h  | mi | h  | mi | h  | mi               | h  | mi | h  | mi | h  | mi                | h  | mi | h  | mi | h  | mi                             | h  |
|            | n           | r  | n  | r  | n  | r  | n                | r  | n  | r  | n  | r  | n                 | r  | n  | r  | n  | r  | n                              | r  |
| COD        | 29          | 2  | 30 | 2  | 83 | 10 | 13               | 1  | 13 | 12 | 67 | 6  | 16                | 1  | 15 | 1  | 29 | 2  | 9.                             | 1  |
|            | ±           | 5  | ±  | 7  | ±  | 6  | ±                | 2  | ±  | ±  | ±  | 4  | ±                 | 6  | ±  | 3  | ±  | 9  | 0                              | 7  |
|            | 17          | ±  | 22 | ±  | 30 | ±  | 7                | ±  | 11 | 2  | 33 | ±  | 3                 | ±  | 2  | ±  | 18 | ±  | ±                              | ±  |
|            |             | 1  |    | 1  |    | 38 |                  | 4  |    |    |    | 2  |                   | 2  |    | 5  |    | 1  | 0.                             | 5  |
|            |             | 8  |    | 5  |    |    |                  |    |    |    |    | 8  |                   |    |    |    |    | 4  | 2                              |    |
| TOC        | 32          | 2  | 35 | 2  | 50 | 40 | 9                | 8. | 6  | 7. | 48 | 4  | 10                | 1  | 13 | 9. | 17 | 1  | 11                             | 7  |
|            | ±           | 4  | ±  | 9  | .0 | ±  | ±                | 0  | ±  | 00 | ±  | 5  | ±                 | 2  | ±  | 2  | ±  | 6  | ±                              | ±  |
|            | 6           | ±  | 16 | ±  | ±  | 1  | 2                | ±  | 4  | ±  | 10 | ±  | 3                 | ±  | 6  | ±  | 5  | ±  | 3                              | 2  |
|            |             | 4  |    | 7  | 0. |    |                  | 0. |    | 0. |    | 9  |                   | 1  |    | 3  |    | 1  |                                |    |
|            |             |    |    |    | 5  |    |                  | 2  |    | 02 |    |    |                   |    |    |    |    | 0  |                                |    |

**Table S2. Characteristics of hydrolysate prepared from algae using various hydrolysing agents**

|                 | Acetic acid |         |        |       | Fe(NO <sub>3</sub> ) <sub>3</sub> |       |        |      | NH <sub>4</sub> Cl |      |        |      |        |      |
|-----------------|-------------|---------|--------|-------|-----------------------------------|-------|--------|------|--------------------|------|--------|------|--------|------|
| Parameters      | 10%         |         | 1%     |       | 2%                                |       | 5%     |      | 1%                 |      | 2%     |      | 5%     |      |
| (mg/g)          | 30 min      | 1 hr    | 30 min | 1 hr  | 30 min                            | 1 hr  | 30 min | 1 hr | 30 min             | 1 hr | 30 min | 1 hr | 30 min | 1 hr |
| COD             | --          | --      | 14     | 16.2  | 18.7                              | 18.8  | 13.6   | 11.2 | 16                 | 16   | 15     | 13   | 29     | 29   |
|                 |             |         |        |       |                                   |       |        |      | ±3                 | ±2   | ±2     | ±5   | ±18    | ±14  |
| TOC             | 66.8        | 76.7    | 5.58   | 8.55  | 7.52                              | 5.92  | 2.02   | 4.51 | 0                  | 0    | 0      | 0    | 0      | 0    |
| Carbohydrates   | 15 ± 7      | 29 ± 15 | 0.31   | 0.25  | 0.2                               | 0.4   | 0.4    | 0    | 2.7                | 1.9  | 3.3    | 2    | 1.8    | 1.8  |
| NO <sub>3</sub> | 0.82        | 0.84    |        |       |                                   |       |        |      |                    |      |        |      |        |      |
| PO <sub>4</sub> | 0.37        | 0.26    |        |       |                                   |       |        |      |                    |      |        |      |        |      |
| Glucose         | 0           | 0       | 0      | 0.099 |                                   | 0.031 |        |      |                    |      |        |      |        |      |
